# Supplementary material for: MMP9: A Tough Target for Targeted Therapy for Cancer
Source: MDPI journal article supplement (doi:10.3390/cancers14071847), 2022-04-06
Supplement: s1 [file s1]

**Table S1.** Members of the matrix metalloproteinase (MMP) family and their tissue inhibitors (TIMPs).

| PROTEIN                                                                                                             | GENE           | MW [Da] | Chromosomal localization | CATALYTIC ACTIVITY                                                                                                                                                                                               | Inhibitor                              |
|---------------------------------------------------------------------------------------------------------------------|----------------|---------|--------------------------|------------------------------------------------------------------------------------------------------------------------------------------------------------------------------------------------------------------|----------------------------------------|
| <b>COLLAGENASES</b>                                                                                                 |                |         |                          |                                                                                                                                                                                                                  |                                        |
| <b>Interstitial collagenase, Collagenase 1, MMP1 (EC:3.4.24.7)</b>                                                  | MMP1           | 54007   | 11q22-q23                | Collagen (I, II, III, VII, X), casein, entactin, laminin, pro-MMP1, -2, -9, alpha-macroglobulins and serpins                                                                                                     | TIMP1, TIMP2, TIMP3, TIMP4             |
| <b>Neutrophil collagenase, Collagenase 2, MMP8 (EC:3.4.24.34)</b>                                                   | MMP8<br>CLG1   | 53412   | 11q21-q22                | fibrillar type I, II, and III collagens, interstitial collagens                                                                                                                                                  | TIMP1, TIMP2                           |
| <b>Collagenase 3, MMP13 (EC:3.4.24.-)</b>                                                                           | MMP13          | 53820   | 11q22.3                  | fibrillar collagen (I, II, III, IV, X and XIV), fibronectin, TNC and ACAN, TGFB1, CCN2, gelatin, aggrecan, fibronectin, casein, laminin, perlecan, plasminogen activator 2, pro-MMP9, pro-MMP13, SDF-1, tenascin | TIMP1, TIMP2, TIMP3                    |
| <b>GELATINASES</b>                                                                                                  |                |         |                          |                                                                                                                                                                                                                  |                                        |
| <b>72 kDa type IV collagenase, MMP2, Gelatinase A (EC:3.4.24.24)</b>                                                | MMP2<br>CLG4A  | 73882   | 16q13                    | Gelatin, collagen (IV, V, VII, X), elastin, fibronectin, KISS, GSK3beta                                                                                                                                          | histatin-5, TIMP1, TIMP2, TIMP3, TIMP4 |
| <b>Matrix metalloproteinase-9, MMP9, Gelatinase B, GELB (EC:3.4.24.35)</b>                                          | MMP9<br>CLG4B  | 78458   | 16q13                    | Gelatin, collagen (IV–VI, X), elastin, fibronectin, KiSS1, NINJ1                                                                                                                                                 | TIMP1, TIMP2, TIMP3, TIMP4             |
| <b>STROMELYSINS</b>                                                                                                 |                |         |                          |                                                                                                                                                                                                                  |                                        |
| <b>Stromelysin-1, MMP3, Transin-1 (EC:3.4.24.17)</b>                                                                | MMP3<br>STMY1  | 53977   | 11q23                    | fibronectin, laminin, gelatins of type I, III, IV, and V; collagens III, IV, X, and IX, and cartilage proteoglycans                                                                                              | TIMP1, TIMP2, TIMP4                    |
| <b>Stromelysin-2, Transin-2, MMP10 (EC:3.4.24.22)</b>                                                               | MMP10<br>STMY2 | 54150   | 11q22.3-q23              | Collagens (I, III–V, IX and X), gelatin, casein, aggrecan, elastin, MMP-1,8                                                                                                                                      | TIMP1, TIMP2                           |
| <b>Stromelysin-3, ST3, STL3, MMP11 (EC:3.4.24.-)</b>                                                                | MMP11<br>STMY3 | 54589   | 22q11.2                  | Elastin, gelatin, collagen I, IV, fibronectin, laminin, vitronectin, proteoglycan, B chain of insulin                                                                                                            | TIMP1, TIMP3                           |
| <b>MEMBRANE-TYPE MMPs</b>                                                                                           |                |         |                          |                                                                                                                                                                                                                  |                                        |
| <b>Matrix metalloproteinase-14, MMP14, Membrane Type 1-Matrix Metalloproteinase, MT1-MMP, MTMMP1 (EC:3.4.24.80)</b> | MMP14          | 65894   | 14q11q-12                | Collagen, progelatinase A, PTK7, MMP15, ADGRB1, collagenase 3, aggrecan                                                                                                                                          | TIMP2, TIMP3                           |

|                                                                                                                        |                                   |       |               |                                                                                                                          |                            |
|------------------------------------------------------------------------------------------------------------------------|-----------------------------------|-------|---------------|--------------------------------------------------------------------------------------------------------------------------|----------------------------|
| <b>Matrix metalloproteinase-15, MMP15, Membrane Type 2-Matrix Metalloproteinase, MT2-MMP, MTMMP2 (EC:3.4.24.-)</b>     | MMP15                             | 75806 | 16q13         | progelatinase A                                                                                                          | TIMP2, TIMP3               |
| <b>Matrix metalloproteinase-16, MMP16, Membrane Type 3-Matrix Metalloproteinase, MT3-MMP, MTMMP3 (EC:3.4.24.-)</b>     | MMP16<br>C8orf57<br>MMPX2         | 69521 | 8q21          | collagen type III and fibronectin, progelatinase A                                                                       | TIMP1, TIMP2               |
| <b>Matrix metalloproteinase-17, MMP17, Membrane Type 4-Matrix Metalloproteinase, MT4-MMP, MTMMP4 (EC:3.4.24.-)</b>     | MMP17<br>MT4MMP                   | 66652 | 12q24.3       | pro-TNF-alpha, progelatinase A, fibrin, pro-TNF-alpha                                                                    |                            |
| <b>Matrix metalloproteinase-24, MMP24, Membrane-type-5 matrix metalloproteinase, MT5-MMP, MTMMP5 (EC:3.4.24.-)</b>     | MMP24<br>MT5MMP                   | 62553 | 20q11.2       | N-cadherin, fibronectin, dermatan sulfate and chondroitin sulfate proteoglycans, progelatinase A                         |                            |
| <b>Matrix metalloproteinase-25, MMP25, Membrane-type-6 matrix metalloproteinase, MT6-MMP, MTMMP6 (EC:3.4.24.-)</b>     | MMP25<br>MMP20<br>MMPL1<br>MT6MMP | 58938 | 16p13.3       | progelatinase A                                                                                                          |                            |
| <b>MATRILYSINS</b>                                                                                                     |                                   |       |               |                                                                                                                          |                            |
| <b>Matrilysin, Matrin, Matrix metalloproteinase-7, MMP7, Pump-1 protease, Uterine metalloproteinase (EC:3.4.24.23)</b> | MMP7<br>MPSL1<br>PUMP1            | 24144 | 11q21-q22     | casein, gelatins of types I, III, IV, and V, and fibronectin. Procollagenase, insulin                                    | TIMP1, TIMP2, TIMP3, TIMP4 |
| <b>Matrix metalloproteinase-26, MMP26, Endometase, Matrilysin-2 (EC:3.4.24.-)</b>                                      | MMP26                             | 29708 | 11p15         | collagen type IV, fibronectin, fibrinogen, beta-casein, type I gelatin and alpha-1 proteinase inhibitor, progelatinase B |                            |
| <b>METALLOELASTASES</b>                                                                                                |                                   |       |               |                                                                                                                          |                            |
| <b>Macrophage metalloelastase, macrophage elastase, metalloproteinase-12, MMP12 (EC:3.4.24.65)</b>                     | MMP12<br>HME                      | 54002 | 11q22.2-q22.3 | Gelatin, collagen IV, pro-MMP9, elastin, insulin                                                                         | TIMP1                      |
| <b>ENAMELYSIN</b>                                                                                                      |                                   |       |               |                                                                                                                          |                            |

|                                                                                                                                             |                                       |       |         |                                                                                                                                         |       |
|---------------------------------------------------------------------------------------------------------------------------------------------|---------------------------------------|-------|---------|-----------------------------------------------------------------------------------------------------------------------------------------|-------|
| <b>Matrix metalloproteinase-20, MMP20, Enamel metalloproteinase, Enamelysin, (EC:3.4.24.-)</b>                                              | MMP20                                 | 62553 | 11q22.3 | aggrecan and the cartilage oligomeric matrix protein (COMP)                                                                             |       |
| <b>Other MMPs</b>                                                                                                                           |                                       |       |         |                                                                                                                                         |       |
| <b>Matrix metalloproteinase-19, MMP19, Matrix metalloproteinase RASI, Matrix metalloproteinase-18, MMP18 (EC:3.4.24.-)</b>                  | MMP19<br>MMP18<br>RASI                | 57356 | 12q14   | collagen type IV, laminin, nidogen, nasrin-C isoform, fibronectin, and type I gelatin, aggrecan and cartilage oligomeric matrix protein | TIMP2 |
| <b>Matrix metalloproteinase-21, MMP21 (EC:3.4.24.-)</b>                                                                                     | MMP21                                 | 65042 | 10q26.3 | alpha-1-antitrypsin                                                                                                                     |       |
| <b>Matrix Metalloproteinase 23A, Matrix Metalloproteinase 22, MMP22, Femalysin, MIFR-1, Matrix metalloproteinase-21, MMP21 (Pseudogene)</b> | MMP21/P<br>MMP22<br>MMP23A<br>MMP23B  |       |         |                                                                                                                                         | TIMP2 |
| <b>Matrix metalloproteinase-27, MMP27 (EC:3.4.24.-)</b>                                                                                     | MMP27<br>UNQ2503/PR<br>O5992          | 59025 | 11q24   | fibronectin, laminin, gelatins and/or collagens                                                                                         |       |
| <b>Matrix metalloproteinase-28, MMP28, Epilysin (EC:3.4.24.-)</b>                                                                           | MMP28<br>MMP25<br>UNQ1893/PR<br>O4339 | 58938 | 17q21.1 | casein                                                                                                                                  |       |
